# Supplementary material for: AANG: A natural compound formula for overcoming multidrug resistance via synergistic rebalancing the TGF‐β/Smad signalling in hepatocellular carcinoma
Source: PubMed Central journal article supplement (PMC8505848; doi:10.1111/jcmm.16928), 2021-09-12
Supplement: JCMM-25-9805-s001.pdf [file JCMM-25-9805-s001.pdf]

| <b>Western Blotting</b>                          |                         |                     |
|--------------------------------------------------|-------------------------|---------------------|
| <b>Primary Antibodies</b>                        | <b>Catalogue Number</b> | <b>Manufacturer</b> |
| p-SMAD3                                          | sc-517575               | Santa Cruz          |
| SMAD3                                            | sc-101154               | Santa Cruz          |
| SMAD7                                            | sc-365846               | Santa Cruz          |
| GAPDH                                            | sc-32233                | Santa Cruz          |
|                                                  |                         |                     |
|                                                  |                         |                     |
| <b>Histology and Immunofluorescence Staining</b> |                         |                     |
| <b>Primary Antibodies</b>                        | <b>Catalogue Number</b> | <b>Manufacturer</b> |
| MDR1                                             | sc-55510                | Santa Cruz          |
| p-SMAD3                                          | sc-517575               | Santa Cruz          |
| TGF- $\beta$ 1                                   | sc-130348               | Santa Cruz          |
| SMAD7                                            | sc-365846               | Santa Cruz          |

**Supplementary Table S1.** List of antibodies used in this study.

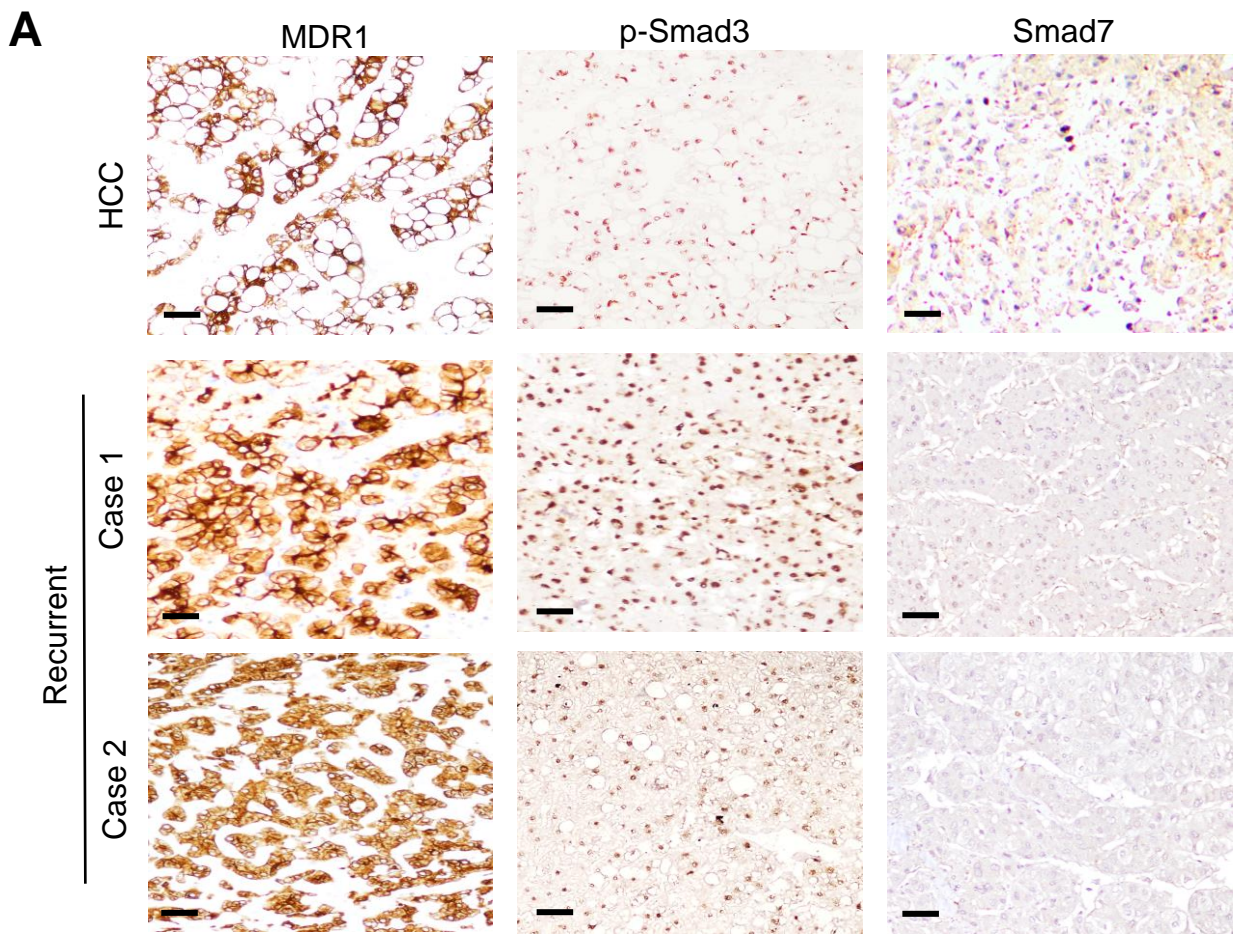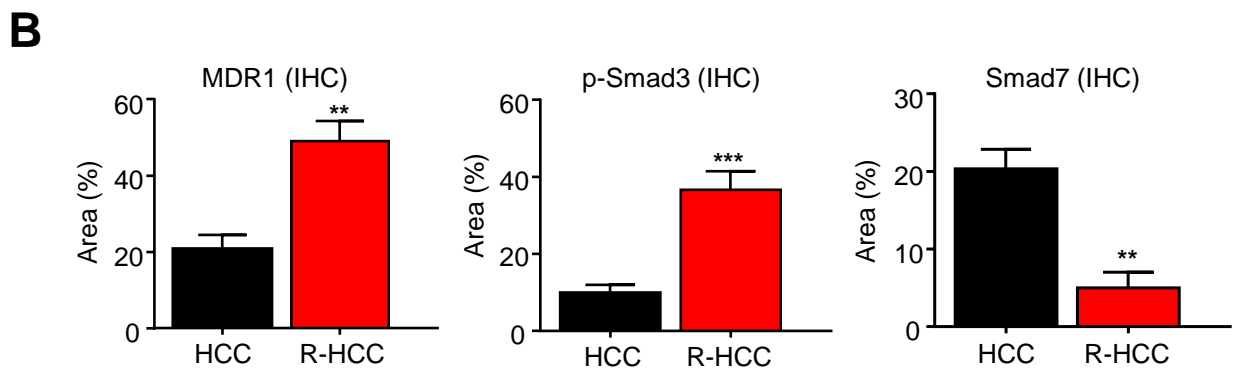

**Supplementary Figure S1. Imbalance of the Smad signaling in patients with primary and recurrent HCC.** The imbalance of Smad3 and Smad7 significantly associates with upregulated p-glycoprotein level in both the primary and recurrent HCC, detected by (A) Immunohistochemistry and (B) their quantification. \*\* $P < 0.01$ , \*\*\* $P < 0.01$  vs HCC,  $n=6$ , one-way ANOVA. Note: The upper two IHC samples are originated from Figure 1, and the lowest panel is an additional case of recurrent HCC. Scale bar (A), 50  $\mu\text{m}$ .

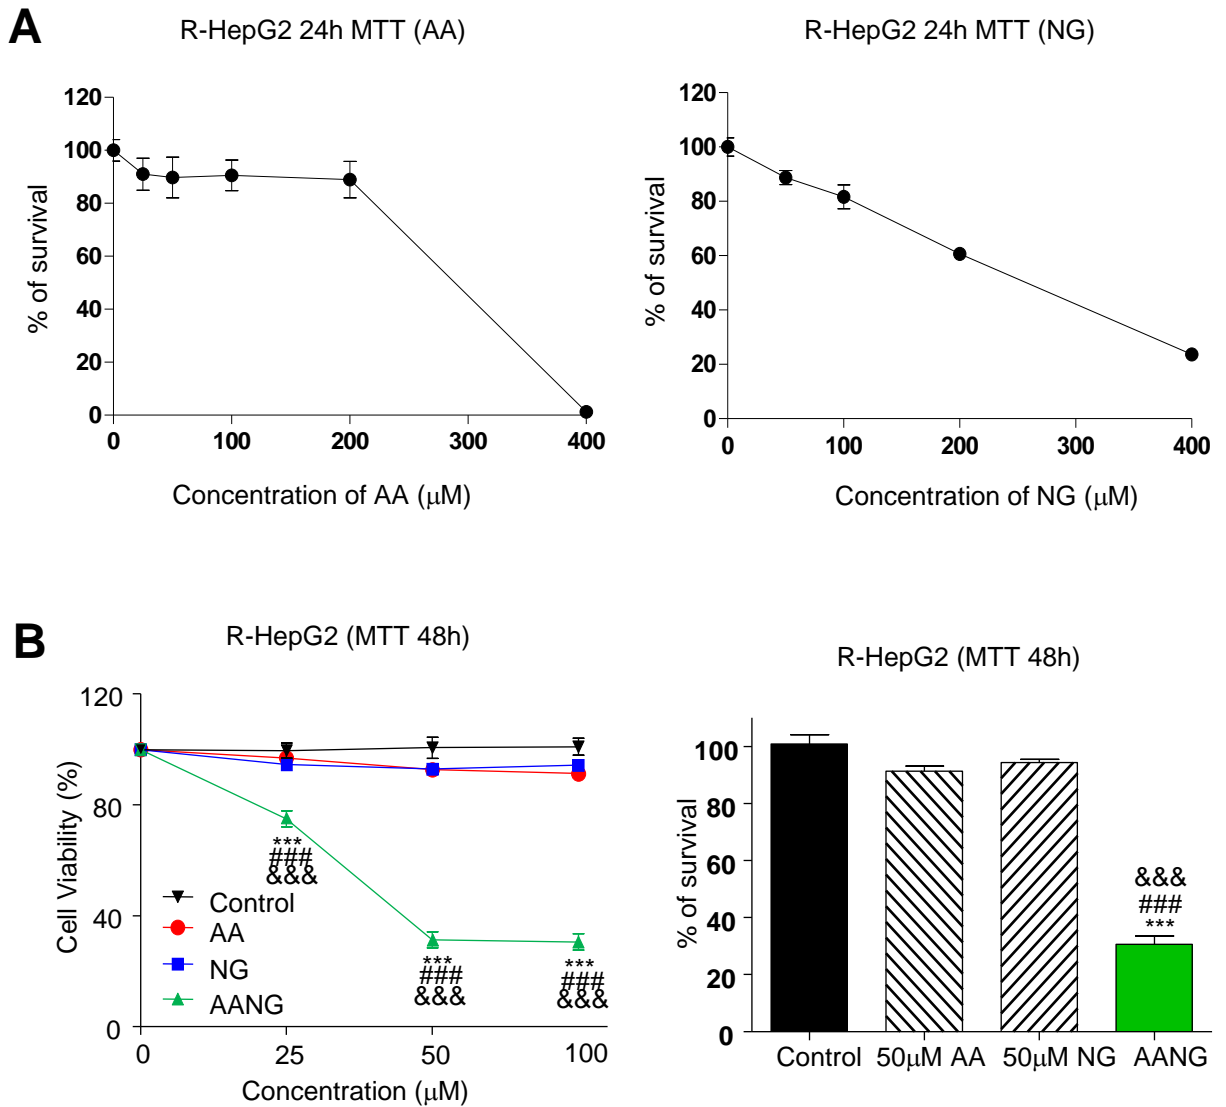

**Supplementary Figure S2. Effect of AA or NG on the proliferation of R-HepG2 cells *in vitro*.** Higher IC<sub>50</sub> of (A) AA or NG monotreatment compared to (Figure 2A) combined treatment were detected by MTT assay on the R-HepG2 cells with 24h treatment *in vitro*. (B) Synergistic inhibitory effect on R-HepG2 growth of AA and NG combination since 25 μM was also observed in 48h treatment *in vitro*. \*\*\*P < 0.001 vs Control, ###P < 0.001 vs NG, &&&P < 0.001 vs AA.

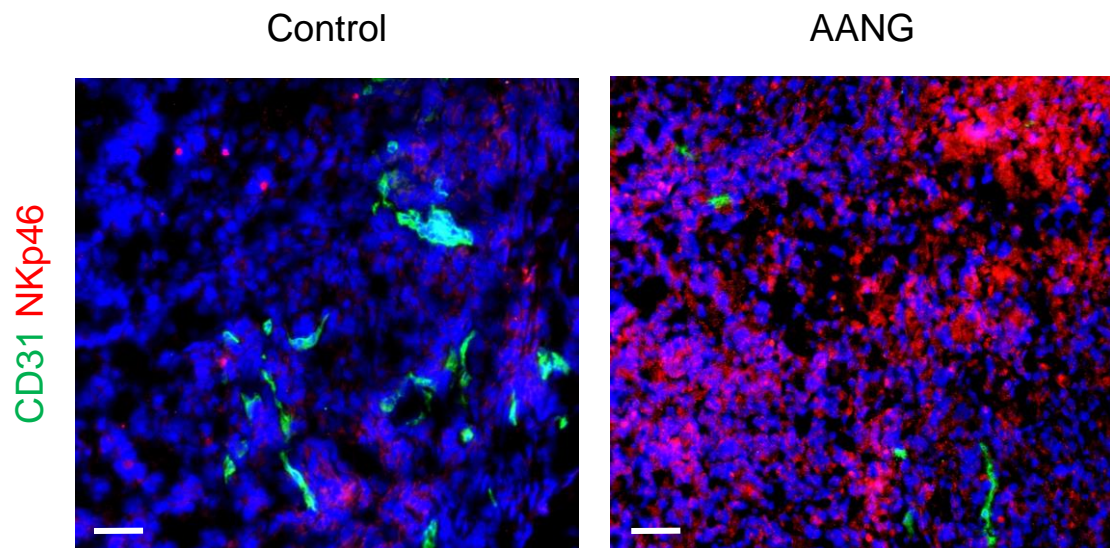

**Supplementary Figure S3. AANG effectively suppressed the protumoral microenvironment of R-HepG2 *in vivo*.** AANG markedly inhibited angiogenesis (CD31) but promoted anticancer natural killer cells (NKp46) in R-HepG2 xenografts *in vivo* (n=8). 50  $\mu$ m.
